# Supplementary material for: RNA-directed DNA methylation prevents rapid and heritable reversal of transposon silencing under heat stress in Zea mays
Source: PLoS Genet. 2021 Jun 14;17(6):e1009326. doi: 10.1371/journal.pgen.1009326 (PMC8224964; doi:10.1371/journal.pgen.1009326)
Supplement: S1 Table — (XLSX) [file pgen.1009326.s006.xlsx]

## Sheet: Table S1
Table S1. Primers used in this paper
Primer	Sequence (5’ to 3’)
Ex1	ACATCCACGCTGTCTCAGCC
RLTIR2	ATGTCGACCCCTAGAGCA
TIRAout	GCTGTCACCTTTCTGTTTTGGCGAT
12-4R3	CGGTATGGCGGCAGTGACA
ZmRDR2_F	TCTCCACCGCCCACTTGAT
ZmRDR2_R	ATGGCCAGCAGGGTGTCGCAGAT
TIR6	AGAGAAGCCAACGCCAWCGCCTCYATTTCGTC
HSP90-qPCR_F	CTCAGAGAGCTCATCTCCAACGC
HSP90-qPCR_R	GATGATGGACAGCGTCTTGCTGG
mudrA-qPCR_F	ATTGTGGTGAATTGGGACACC
mudrA-qPCR_R	TCCTCTGCTACGTCTGGCTGT
mudrB-qPCR_F	ATCTCAACGAATTCTTTATGCT
mudrB-qPCR_R	TTCAGTTCGCCGCCATT
Tub2-qPCR_F	CTACCTCACGGCATCTGCTATGT
Tub2-qPCR_R	GTCACACACACTCGACTTCACG
p1bis2f	GTTGGYGAGGAGGAGYAYGAGGTG
TIRAbis2R	CARCTCCCRARAACACTCCAATTC
TIRAmF6	TYAGGGAAYTGGAGYGAYGGGTG
methy_TIRBF	GTTAACCAAACAAGGCAGAGAT
methy_TIRBR	CAGTCGTCCGTTTTATGATTC
pGEM_F	TGTAATACGACTCACTATAGGGCG
pGEMT_R	ATTTAGGTGACACTATAGAATACTC
copia_F	CGATGTGAAGACAGCATTCCT
copia_R	CTCAAGTGACATCCCATGTGT
TIRAR	AGGAGAGACGGTGACAAGAGGAGTA
TIRAUTRR	ACTGGAGCGACGGGTGCTCGGCT
W = A,T
Y = C,T
R = A,G
